# Supplementary material
Source: Elsevier journal article supplement (https://www.sciencedirect.com/science/article/pii/S2013251419300823)
Supplement: mmc1 [file S2013251419300823:mmc1.docx]

**Epidemiología del trasplante renal en Brasil**

**Kidney transplantation epidemiology in Brazil**

**Authors:**

Reginaldo Passoni dos Santos, RN1

Ariana Rodrigues da Silva Carvalho, RN, PhD1

Luis Alberto Batista Peres, MD, PhD1

1Postgraduate Program in Biosciences and Health, State University of Western Paraná, Cascavel, PR, Brazil

2Nursing Department, State University of Western Paraná, Cascavel, PR, Brazil

3Medicine Department, State University of Western Paraná, Cascavel, PR, Brazil

**Correspondence:**

Reginaldo Passoni dos Santos

Postgraduate Program in Biosciences and Health, State University of Western Paraná

Rua Universitária, 2069, Jardim Universitário.

Zip Code: 85819-110 - Cascavel, Paraná (PR) – Brazil.

Phone: +55 (45) 3220-3132

Email: regi-pas@hotmail.com

**Electronic Supplementary Material**

**Table 1:** Absolute (A) and relative (B) numbers of kidney transplants occurred in Brazil, by period/year, region of country and donor type.

**A**

| **Period/Year** | **Region of the country** | | | | | | | | | |
| --- | --- | --- | --- | --- | --- | --- | --- | --- | --- | --- |
| **North** | | **Northeast** | | **Midwest** | | **Southeast** | | **South** | |
| Living | Deceased | Living | Deceased | Living | Deceased | Living | Deceased | Living | Deceased |
| 1995 to 2004* | 181 | 90 | 1,564 | 1,120 | 757 | 735 | 9,267 | 6,695 | 2,348 | 2,739 |
| 2005 | 27 | 31 | 175 | 308 | 85 | 82 | 1,130 | 840 | 333 | 356 |
| 2006 | 31 | 40 | 249 | 238 | 79 | 53 | 1,071 | 840 | 330 | 354 |
| 2007 | 34 | 12 | 180 | 294 | 62 | 46 | 1,094 | 910 | 343 | 487 |
| 2008 | 27 | 15 | 210 | 330 | 75 | 73 | 1,129 | 1,125 | 347 | 492 |
| 2009 | 29 | 18 | 194 | 417 | 67 | 89 | 1,118 | 1,449 | 344 | 573 |
| 2010 | 47 | 24 | 203 | 479 | 81 | 88 | 967 | 1,846 | 358 | 569 |
| 2011 | 33 | 68 | 187 | 532 | 81 | 97 | 1,000 | 1,868 | 361 | 766 |
| 2012 | 37 | 91 | 153 | 698 | 76 | 143 | 926 | 2,071 | 312 | 928 |
| 2013 | 33 | 69 | 124 | 731 | 68 | 177 | 876 | 2,120 | 285 | 928 |
| 2014 | 27 | 64 | 132 | 715 | 33 | 134 | 904 | 2,368 | 290 | 990 |
| 2015 | 31 | 100 | 107 | 793 | 31 | 141 | 800 | 2,332 | 220 | 1,035 |
| 1995 to 2015 | 537 | 622 | 3,478 | 6,655 | 1,495 | 1,858 | 20,282 | 24,464 | 5,871 | 10,217 |

*We not found stratified data per year to each region and donor type during the period 1995-2004. Thus, the data for this period are grouped.

**Source**: Brazilian Registry of Transplants (February/2017).

**B**

| **Period/Year** | **Region of the country** | | | | | | | | | |
| --- | --- | --- | --- | --- | --- | --- | --- | --- | --- | --- |
| **North** | | **Northeast** | | **Midwest** | | **Southeast** | | **South** | |
| Living | Deceased | Living | Deceased | Living | Deceased | Living | Deceased | Living | Deceased |
| 1995 to 2004* | 66.8 | 33.2 | 58.3 | 41.7 | 50.7 | 49.3 | 58.1 | 41.9 | 46.2 | 53.8 |
| 2005 | 46.6 | 53.4 | 36.2 | 63.8 | 50.9 | 49.1 | 57.3 | 42.6 | 48.3 | 51.7 |
| 2006 | 43.7 | 56.3 | 51.1 | 48.9 | 59.9 | 40.2 | 56.0 | 44.0 | 48.2 | 51.8 |
| 2007 | 73.9 | 26.1 | 38.0 | 62.0 | 57.4 | 42.6 | 54.6 | 45.4 | 41.3 | 58.7 |
| 2008 | 64.3 | 35.7 | 38.9 | 61.1 | 50.7 | 49.3 | 50.1 | 49.9 | 41.4 | 58.6 |
| 2009 | 61.7 | 38.3 | 31.8 | 68.2 | 42.9 | 57.1 | 43.6 | 56.4 | 37.5 | 62.5 |
| 2010 | 66.2 | 33.8 | 29.8 | 70.2 | 47.9 | 52.1 | 34.4 | 65.6 | 38.6 | 61.4 |
| 2011 | 32.7 | 67.3 | 26.0 | 74.0 | 45.5 | 54.5 | 34.9 | 65.1 | 32.0 | 68.0 |
| 2012 | 28.9 | 71.1 | 18.0 | 82.0 | 34.7 | 65.3 | 30.9 | 69.1 | 25.5 | 74.8 |
| 2013 | 32.4 | 67.6 | 14.5 | 85.5 | 27.8 | 72.2 | 29.2 | 70.8 | 23.5 | 76.5 |
| 2014 | 29.7 | 70.3 | 15.6 | 84.4 | 19.8 | 80.2 | 27.6 | 72.4 | 22.7 | 77.3 |
| 2015 | 23.7 | 76.3 | 11.9 | 88.1 | 18.0 | 82.0 | 25.5 | 74.5 | 17.5 | 82.5 |
| 1995 to 2015 | 46.3 | 53.7 | 34.3 | 65.7 | 44.6 | 55.4 | 45.3 | 54.7 | 36.5 | 63.5 |

*We not found stratified data per year to each region and donor type during the period 1995-2004. Thus, the data for this period are grouped.

**Source**: Brazilian Registry of Transplants (February/2017).

**Table 2:** Percentage distribution of gross domestic product (GDP) and kidney transplants (KT) between 2005 and 2014, according to the Brazilian region.

| **Year*** | **Region of the country** | | | | | | | | | |
| --- | --- | --- | --- | --- | --- | --- | --- | --- | --- | --- |
| **North** | | **Northeast** | | **Midwest** | | **Southeast** | | **South** | |
| GDP (%) | KT (%) | GDP (%) | KT (%) | GDP (%) | KT (%) | GDP (%) | KT (%) | GDP (%) | KT (%) |
| 2005 | 5.0 | 1.7 | 13.1 | 14.3 | 8.9 | 5.0 | 56.5 | 58.5 | 16.6 | 20.5 |
| 2006 | 5.1 | 2.2 | 13.1 | 14.8 | 8.7 | 4.0 | 56.8 | 58.2 | 16.3 | 20.8 |
| 2007 | 5.0 | 1.3 | 13.1 | 13.7 | 8.9 | 3.1 | 56.4 | 57.9 | 16.6 | 24.0 |
| 2008 | 5.1 | 1.1 | 13.1 | 14.1 | 9.2 | 3.9 | 56.0 | 59.0 | 16.6 | 21.9 |
| 2009 | 5.0 | 1.1 | 13.5 | 14.2 | 9.6 | 3.6 | 55.3 | 59.7 | 16.5 | 21.3 |
| 2010 | 5.3 | 1.5 | 13.5 | 14.6 | 9.1 | 3.6 | 56.1 | 60.3 | 16.0 | 19.9 |
| 2011 | 5.5 | 2.0 | 13.3 | 14.4 | 9.1 | 3.6 | 56.1 | 57.4 | 15.9 | 22.6 |
| 2012 | 5.4 | 2.4 | 13.6 | 15.7 | 9.2 | 4.0 | 55.9 | 55.1 | 15.9 | 22.8 |
| 2013 | 5.5 | 1.9 | 13.6 | 15.8 | 9.1 | 4.5 | 55.3 | 55.4 | 16.5 | 22.4 |
| 2014 | 5.3 | 1.6 | 13.9 | 15.0 | 9.4 | 3.0 | 54.9 | 57.8 | 16.4 | 22.6 |
| 2015 | 5.4 | 2.3 | 14.2 | 16.1 | 9.7 | 3.1 | 54.0 | 56.0 | 16.8 | 22.5 |

*We not found stratified data per year for the period 1995-2004. Thus, only data from 2005 onwards were included.

**Legend:** % - Percentage share on GDP and KT in Brazil data in each year.

**Source**: Brazilian Registry of Transplants (February/2017) and Brazilian Institute of Geography and Statistics.
